# Supplementary material for: Performance of Ag/Al2O3catalysts in the liquid phase oxidation of glycerol – effect of preparation method and reaction conditions
Source: Royal Society of Chemistry journal article supplement (doi:10.1039/c5cy01581b), 2015-11-26
Supplement: c5cy01581b1.pdf [file c5cy01581b1.pdf]

## Catalysis Science & Technology

Electronic Supplementary Information (ESI)

### Performance of Ag/Al<sub>2</sub>O<sub>3</sub> catalysts in the liquid phase oxidation of glycerol – effect of preparation method and reaction conditions

E. Skrzyńska,\* S. Zaid, A. Addad, J-S. Girardon, M. Capron\* and F. Dumeignil.

#### ESI 1 – N<sub>2</sub> adsorption-desorption isotherms.

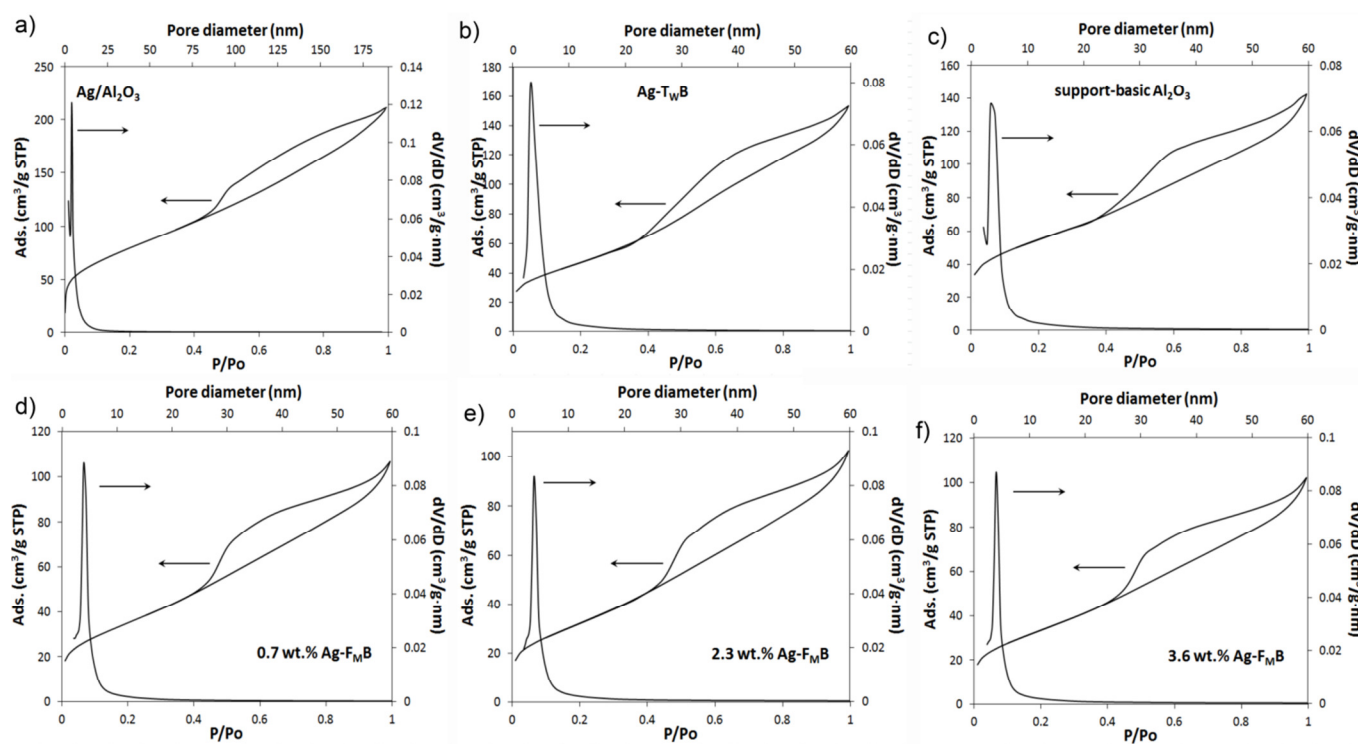

Nitrogen adsorption/desorption profiles and calculated pore diameter distribution (BJH method) of fresh catalyst samples: (a) commercial Ag/Al<sub>2</sub>O<sub>3</sub>; (b) catalyst Ag-T<sub>W</sub>B prepared by thermal reduction method; (c) basic alumina support; (d-f) catalysts prepared by formaldehyde reduction method with various silver loading.

## ESI 2 – Selectivity to glycolic acid as a function of glycerol conversion over the supported silver catalysts.

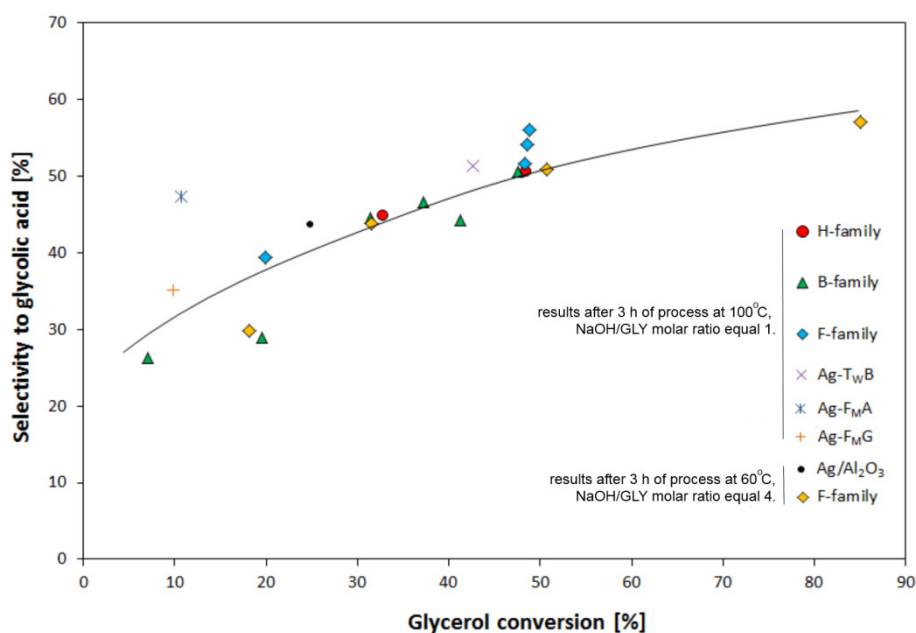

Selectivity to glycolic acid plotted as a function of glycerol conversion over all the tested catalysts. Main reaction conditions: 3 h of process, 5 bars of oxygen, 0.5 g of catalyst, 200 cm<sup>3</sup> of a 0.3 M pure glycerol solution, reaction temperature and NaOH/GLY molar ratio as stated on the figure.

## ESI 3 – Scheme of the catalytic test rig.

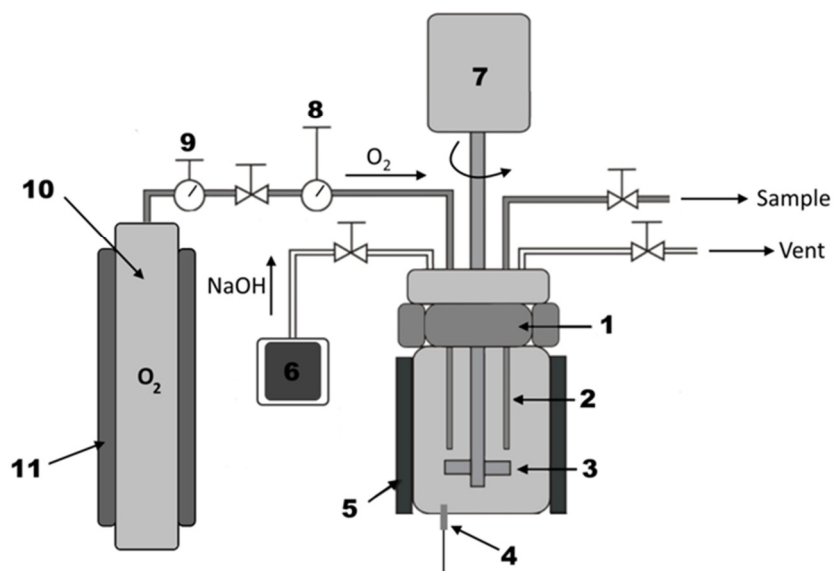

Elements on scheme:

- |                  |                                |                                     |
|------------------|--------------------------------|-------------------------------------|
| 1. Autoclave     | 5. Heating ring for autoclave  | 9. Oxygen reserve controller        |
| 2. Sampling line | 6. High pressure pump          | 10. Oxygen reserve                  |
| 3. Stirrer       | 7. Stirrer controller          | 11. Heating ring for oxygen reserve |
| 4. Thermocouple  | 8. Reactor pressure controller |                                     |

## ESI 4 – Reproducibility of the results.

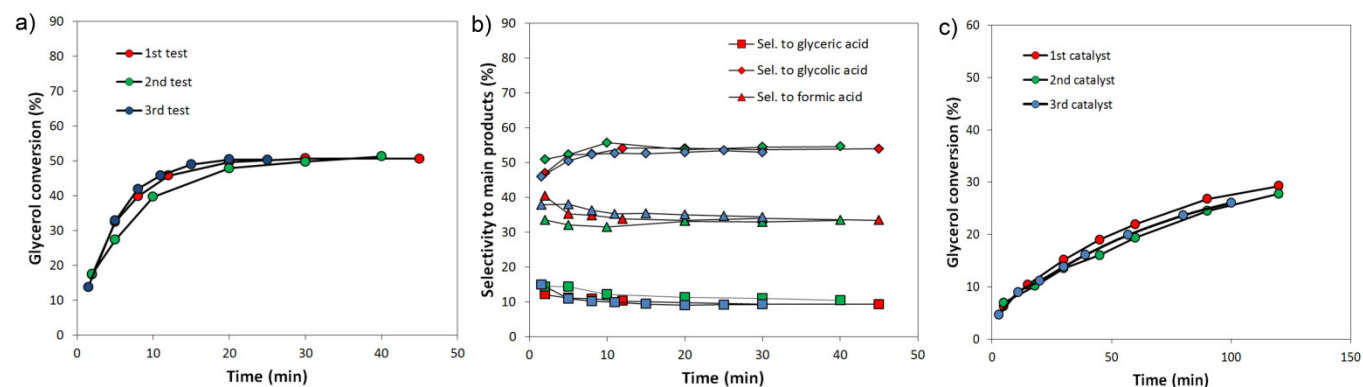

Glycerol conversions and selectivities to the main products observed during three independent tests using the 3.6 wt.% Ag-F<sub>M</sub>B catalyst (figures a & b) at 100 °C and NaOH/GLY = 1 molar ratio, and comparison of the glycerol conversion using three different baths of 1.1 wt.% Ag-F<sub>M</sub>B catalyst (figure c) at 60 °C using NaOH/GLY molar ratio of 4. Other reaction conditions: 0.5 g of catalyst, 200 cm<sup>3</sup> of a 0.3 M pure glycerol solution, 5 bars of oxygen, 1500 rpm.
